# Supplementary material for: Phylogenomic analysis of the diversity of graspetides and proteins involved in their biosynthesis
Source: PubMed Central journal article supplement (PMC8939145; doi:10.1186/s13062-022-00320-2), 2022-03-21
Supplement: 13062_2022_320_MOESM1_ESM.pdf [file 13062_2022_320_MOESM1_ESM.pdf]

**A**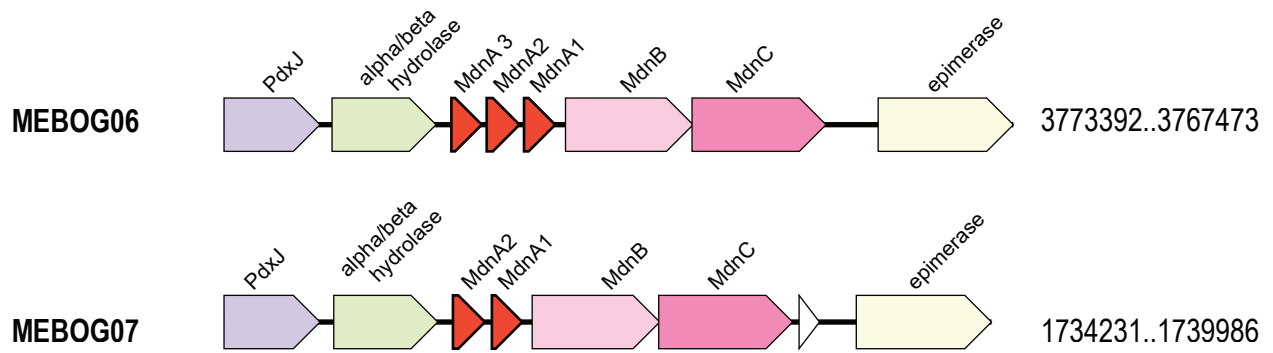**B**

*C. formosense* MEKKKLLK-**PF**FAS**FL**ENQIKD**T**KAV**Q**GGASA----TGIT**T**PLK**D**VT**K**PAY-----D**Q**Q**Q****T**M**K**Y**P****S****D****G****D****E**SGV----

*C. gregarium* MENRKS**K**K-**PF**FAS**FL**E**K**Q**I**ED**P**E**K**I**K**GGAV**T**SALVD**N**V**T**SV**N**K**D**N**V**T**S**SL**L**-DH**V**T**K**P---GG**D**N**V****T**M**K**Y**P****S****D****G****D****E**D**G**NAV-

0600003570 MKNK**D**S**K**K**K****P****F**F**A****T****F****L**E**K**Q**I**K**D**P**E****T****V****K**GG**A****G**S----DM**I****T****I****P****E****R****D****F****V****T****K****P****L**A-DD**V****T****S****P****Q**--LD**L****M****H****T**M**K**Y**P****S****D****G****D****D****S****M****T****M****P****L**

0600003571 MENK**N**S**K**K**K****P****F**F**A****T****F****L**E**K**Q**I**K**D**P**E****T****V****K**GG**T****S****T****S****L****L****T****D****S****V****T****S****V****I****K****D****H****I****T****T****A****L****E****D****S****V****T****P**---N**N****D****N****V****T****L****K****Y****P****S****D****G****D****D****H****V****F****E****P****Q****D**

0600003572 MENK**N**S**K**K**K****P****F**F**A****T****F****L**E**K**Q**I**K**D**P**E****T****V****K**GG-----G**T****I****T****S****V****I****K****D****H****I****I****T****T****L****E****D****T****V****V****T****Q****I****N****D****H****V****N****V****T****L****K****Y****P****S****D****G****D****D****D****V****L****D****V**--

0700001629 MENK**N**S**K**K**K****P****F**F**A****T****F****L**E**K**Q**V****K****D**P**E****T****V****K**GG**A****I****T****S****K****L****A****D****Q****I****T****S****V****I****K****D****H****I****T****T****A****L****E****D****S****V****T****P**---D**N****D****N****V****T**M**K**Y**P****S****D****G****D****D****D****V****F****E****M**--

0700001630 M**K****S****N****S****S****K****K****K****P****F**F**A****S****FL**E**K**Q**V****K****D**P**E****T****V****K**GG**T**-----D**I****I****S****I****P****E****R****D****M****I****T****K****P****S****V**-D**T****V****T****S****P****K**--D**D****M****H****T**M**K**Y**P****S****D****G****D****D****D****T****I****T****I****P****L**
