# Supplementary material for: Phylogenomic analysis of the diversity of graspetides and proteins involved in their biosynthesis
Source: PubMed Central journal article supplement (PMC8939145; doi:10.1186/s13062-022-00320-2), 2022-03-21
Supplement: 13062_2022_320_MOESM4_ESM.pdf [file 13062_2022_320_MOESM4_ESM.pdf]

*Streptomyces cirratus* AB896796, 63..28868

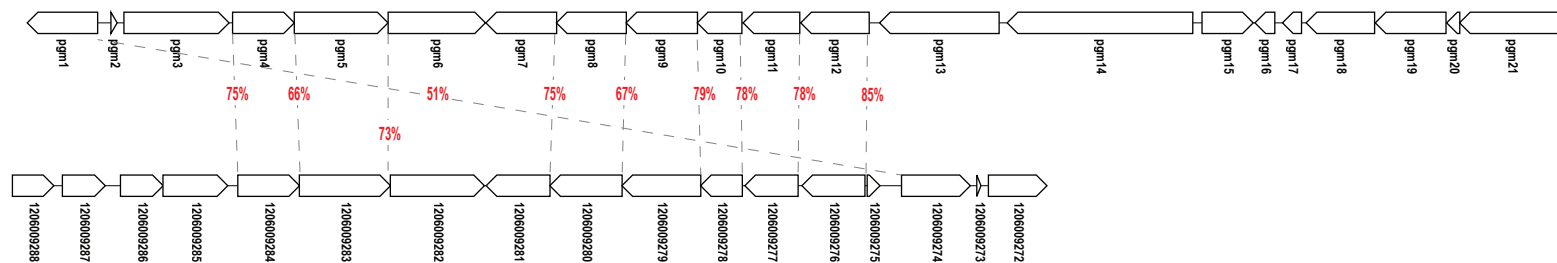

*Streptomyces viridosporus* T7A JH993790.1, 5911187..5891790

|       |                                                              |
|-------|--------------------------------------------------------------|
| pgm1  | peptide ligase                                               |
| pgm2  | Pheganomycin precursor                                       |
| pgm3  | radical SAM domain containing protein                        |
| pgm4  | C-methyltransferase                                          |
| pgm5  | ABC transporter                                              |
| pgm6  | ABC transporter                                              |
| pgm7  | cytochrome P450                                              |
| pgm8  | aminotransferase                                             |
| pgm9  | enoyl-CoA hydratase like protein                             |
| pgm10 | enoyl-CoA hydratase like protein                             |
| pgm11 | chalcone and stilbene synthase like protein                  |
| pgm12 | amidinotransferase                                           |
| pgm13 | hypothetical protein                                         |
| pgm14 | peptidase                                                    |
| pgm15 | transcriptional regulator LysR                               |
| pgm16 | hypothetical protein                                         |
| pgm17 | hypothetical protein                                         |
| pgm18 | permease                                                     |
| pgm19 | non-ribosomal peptide synthetase C-domain containing protein |
| pgm20 | non-ribosomal peptide synthetase T-domain containing protein |
| pgm21 | non-ribosomal peptide synthetase A-domain containing protein |

|            |                                                                    |
|------------|--------------------------------------------------------------------|
| 1206009272 | ATP-grasp                                                          |
| 1206009273 | possible precursor                                                 |
| 1206009274 | PGM1-like ATP-grasp                                                |
| 1206009275 | hypothetical protein                                               |
| 1206009276 | amidinotransferase                                                 |
| 1206009277 | Chalcone and stilbene synthase family protein                      |
| 1206009278 | enoyl-CoA hydratase like protein                                   |
| 1206009279 | enoyl-CoA hydratase like protein                                   |
| 1206009280 | Aminotransferase                                                   |
| 1206009281 | Cytochrome P450                                                    |
| 1206009282 | ABC transporter permease                                           |
| 1206009283 | ABC-type multidrug transport system, ATPase and permease component |
| 1206009284 | O-methyltransferase                                                |
| 1206009285 | UDP-glycosyltransferases                                           |
| 1206009286 | DNA binding domain of the transcription regulators TipA            |
| 1206009287 | O-methyltransferase                                                |
| 1206009288 | enoyl-CoA hydratase like protein                                   |
