# Supplementary material for: Phylogenomic analysis of the diversity of graspetides and proteins involved in their biosynthesis
Source: PubMed Central journal article supplement (PMC8939145; doi:10.1186/s13062-022-00320-2), 2022-03-21
Supplement: 13062_2022_320_MOESM5_ESM.pdf [file 13062_2022_320_MOESM5_ESM.pdf]

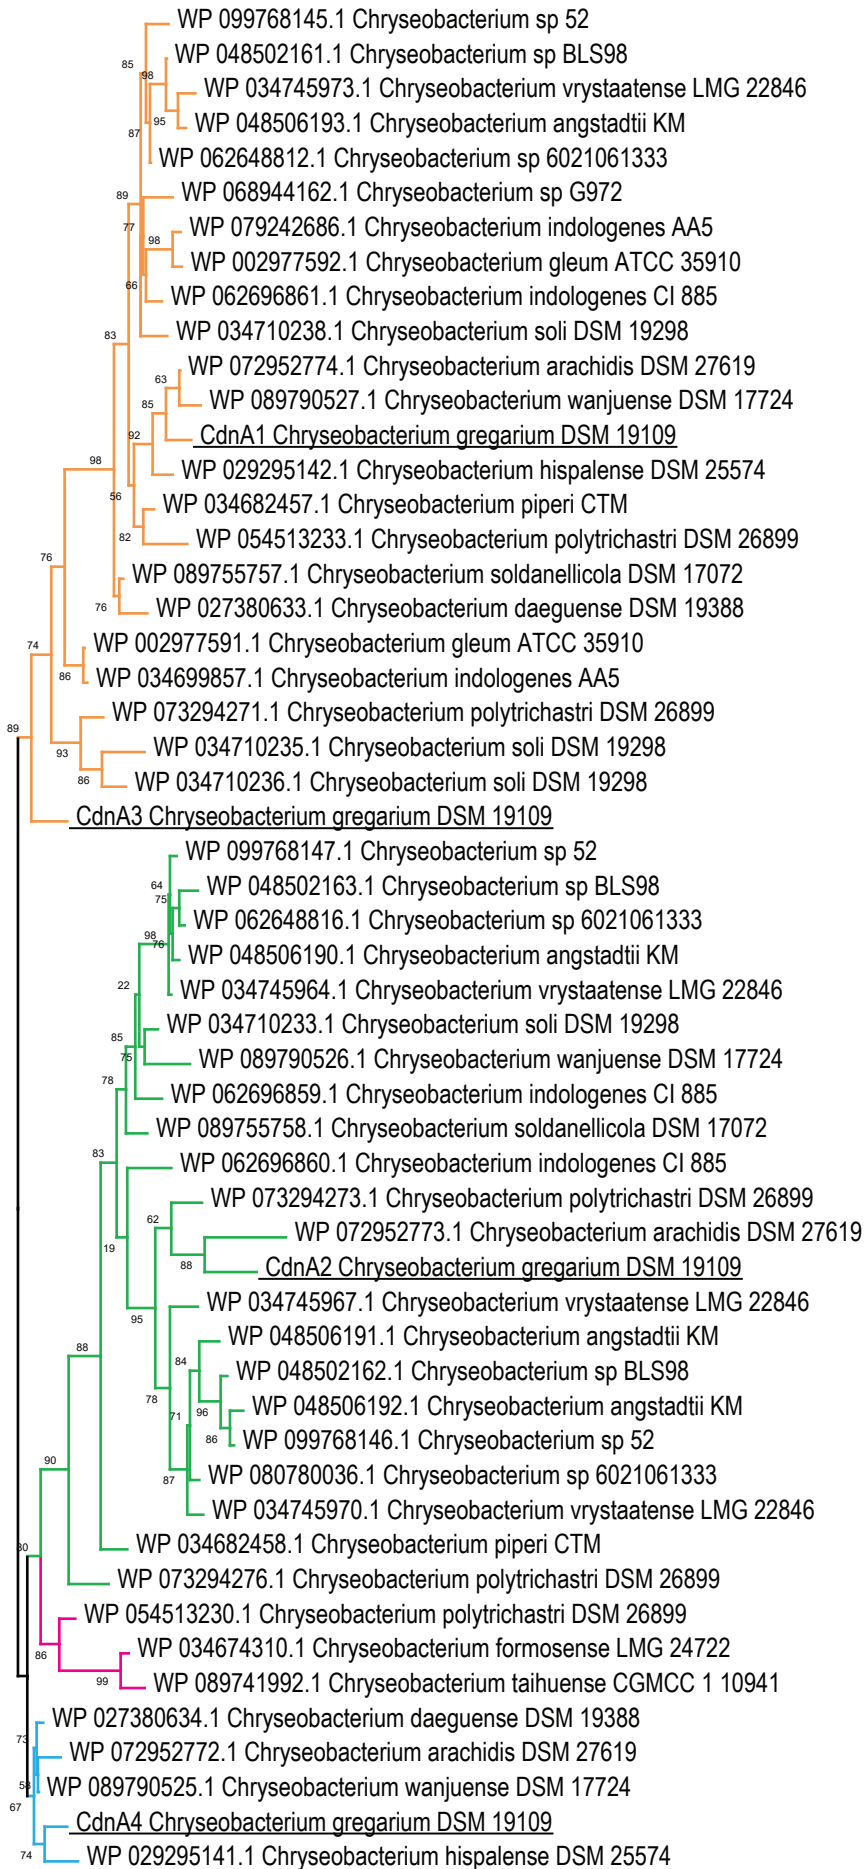

1

2

3

4

0.50
