# Supplementary material for: Phylogenomic analysis of the diversity of graspetides and proteins involved in their biosynthesis
Source: PubMed Central journal article supplement (PMC8939145; doi:10.1186/s13062-022-00320-2), 2022-03-21

**A**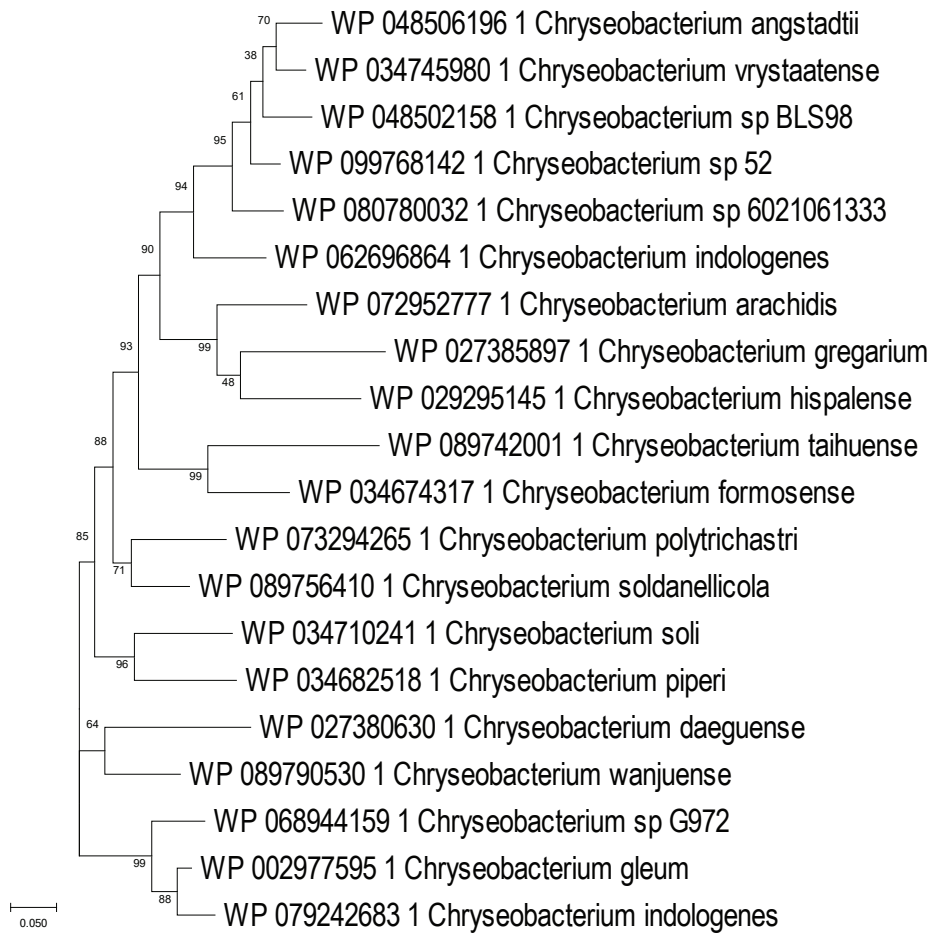**B**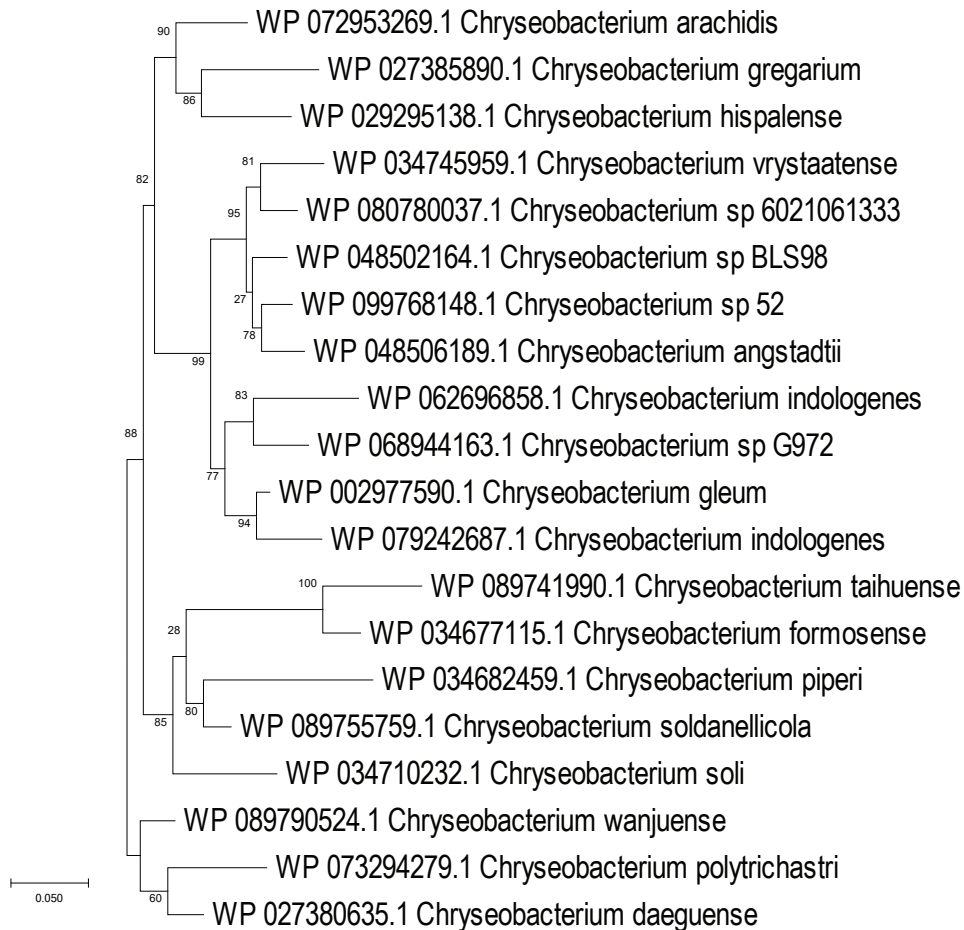

Supplement: 13062_2022_320_MOESM7_ESM.pdf [file 13062_2022_320_MOESM7_ESM.pdf]
